# Supplementary material
Source: publisher figshare collection journal article supplement (https://gsapubs.figshare.com/ndownloader/files/35633354)
Supplement: Supplementary file 1 [file 35633354]

## Geoheritage: Progress toward Preservation

**Renee M. Clary**, Dept. of Geosciences, Mississippi State University, Mississippi State, Mississippi 39762-5448, USA, RClary@geosci.msstate.edu; **William Andrews**, Kentucky Geological Survey, University of Kentucky, Lexington, Kentucky 40506-0107, USA, and **Tim Connors**, National Park Service

| Table S1. Geoheritage Video and Story Maps, Aligned to the Next Generation Science Standards Earth and Space Science Disciplinary Core Ideas, with Suggested Free Resources from SERC Carlton Teach the Earth Collection |                                                         |                                                                                     |                     |                                                                                                                                                                    |
|--------------------------------------------------------------------------------------------------------------------------------------------------------------------------------------------------------------------------|---------------------------------------------------------|-------------------------------------------------------------------------------------|---------------------|--------------------------------------------------------------------------------------------------------------------------------------------------------------------|
| U.S. State                                                                                                                                                                                                               | Title                                                   | Contents                                                                            | NGSS <sup>1</sup>   | Teach the Earth <sup>2</sup>                                                                                                                                       |
| <b>Videos</b>                                                                                                                                                                                                            |                                                         |                                                                                     |                     |                                                                                                                                                                    |
| Colorado                                                                                                                                                                                                                 | Florissant Fossil Beds                                  | Florissant Fossil Beds National Monument's Eocene fossils and Geoheritage history   | ESS1C, ESS2E        | SERC Site Guide Geologic Time; InTeGrate Changing Biosphere                                                                                                        |
| Illinois                                                                                                                                                                                                                 | Bridgeport Quarry                                       | Palmisano Park, Chicago, an urban Geoheritage site                                  | ESS2A, ESS3A, ESS3C | InTeGrate Changing Biosphere; MnSTEP Discovering the Effect Mining has on Land; EarthLabs A Bird's Eye View; Early Career Geoscience Faculty Illinois through Time |
| Illinois                                                                                                                                                                                                                 | Reflecting on Rock River                                | Rock River in Illinois and Wisconsin, known as Sinnissippi to indigenous peoples    | ESS2C               | MnSTEP Stream Study; MnSTEP Water Quality; MnSTEP Investigating how Terrain and Watershed are Connected                                                            |
| Kentucky                                                                                                                                                                                                                 | Kentucky's Natural Sandstone Arches                     | Kentucky: the eastern state with most natural sandstone arches                      | ESS2C               | MnSTEP Investigating Erosion                                                                                                                                       |
| Montana                                                                                                                                                                                                                  | The Beartooth Mountains                                 | Bear Tooth Mountains, MT & WY, contain 4 billion years of Earth history             | ESS1C, ESS3A        | SERC Site Guide Geologic Time; MnSTEP Discovering the Effect Mining has on Land                                                                                    |
| Texas                                                                                                                                                                                                                    | Connecting Geoheritage with Curriculum Standards        | Geoheritage of Texas State Parks connected with US grade 8 ESS Curriculum Standards | ESS2A, ESS3A, ESS3C | MnSTEP Investigating Earth Changes; EarthLabs A Bird's Eye View; Teaching Introductory Geoscience Courses Geologic Maps and Geologic Structures: A Texas Example   |
| Wyoming                                                                                                                                                                                                                  | <i>Exploring Opportunities</i> : Rising from the Plains | Geoheritage journey across Wyoming                                                  | ESS3A               | MnSTEP Discovering the Effect Mining has on Land                                                                                                                   |

|                          |                                                         |                                                                                |                            |                                                                                                                                                                                                      |
|--------------------------|---------------------------------------------------------|--------------------------------------------------------------------------------|----------------------------|------------------------------------------------------------------------------------------------------------------------------------------------------------------------------------------------------|
| Kentucky                 | <i>Exploring Opportunities:</i><br>Kentucky Rock Fences | McConnell Springs and Shaker Springs, Lexington, KY                            | ESS2A, ESS3A, ESS3C        | EarthScope ANGLE Build a Better Wall; SERC Site Guide Geologic Time; EarthLabs A Bird's Eye View                                                                                                     |
| <b><i>Story Maps</i></b> |                                                         |                                                                                |                            |                                                                                                                                                                                                      |
| Arizona                  | S P Mountain Field Guide                                | San Francisco Volcanic Field, AZ, with analogies to lunar and Martian surfaces | ESS1B, ESS2B               | Mars for Earthlings: Integrating Introductory Geology with Mars Planetary Data; EarthScope ANGLE Measure a Changing Volcano                                                                          |
| California               | Geological Gems of the California State Parks           | The geology of 50+ GeoGems of CA State Park system                             | ESS2B, ESS3B               | EarthScope ANGLE Fault Models for Teaching About Plate Tectonics; Geodesy Exploring plate motion and deformation in California with GPS; EarthScope ANGLE Geologic Hazards and the Built Environment |
| Delaware                 | The Hunt for Delaware Boundary Monuments                | Survey of Delaware, Boundary monuments, and the Mason-Dixon Line               | ESS2C, ESS3                | MnSTEP Mapping Your World                                                                                                                                                                            |
| Kentucky                 | Camp Nelson National Monument: A Geologic Story         | American Civil War camp established by Union Army                              | ESS3                       | MnSTEP Investigating how Terrain and Watershed are Connected; MnSTEP Mapping Your World; Teaching Introductory Geoscience Geology of Mammoth Cave National Park                                      |
| Maine                    | Explore Maine Geology                                   | 260+ field localities grouped by bedrock, surficial, coastal, or other         | ESS1C, ESS2A, ESS2E, ESS3A | SERC Site Guide Geologic Time; MnSTEP Discovering the Effect Mining has on Land; InTeGrate Changing Biosphere; Using GIS And Remote Sensing to Teach Geoscience Land Use Change in MidCoast Maine    |
| Missouri                 | Katy Trail State Park                                   | The US longest rail to trail, rural history, and geology                       | ESS2C, ESS3A, ESS3C        | MnSTEP Investigating how Terrain and Watershed are Connected, MnSTEP Investigating Erosion, MnSTEP Discovering the Effect Mining has on Land; EarthLabs A Bird's Eye View                            |
| New Hampshire            | New Hampshire Stone Wall Mapper                         | Stone walls, connecting landscape to culture, LiDAR interpretation             | ESS3                       | MnSTEP Mapping Your World                                                                                                                                                                            |
| Texas                    | Texas GeoSign Project                                   | Geologic information signs in Texas                                            | ESS2A, ESS3A, ESS3C        | MnSTEP Investigating Earth Changes; EarthLabs A Bird's Eye View; Teaching Introductory Geoscience Courses Geologic                                                                                   |

|            |                                              |                                                       |                     |                                                                                                                                                                                                                               |
|------------|----------------------------------------------|-------------------------------------------------------|---------------------|-------------------------------------------------------------------------------------------------------------------------------------------------------------------------------------------------------------------------------|
|            |                                              |                                                       |                     | Maps and Geologic Structures: A Texas Example                                                                                                                                                                                 |
| Texas      | Texas Historical Imagery Viewer              | 10 TX state parks feature modern and historic imagery | ESS2A, ESS3A, ESS3C | MnSTEP Investigating Earth Changes; EarthLabs A Bird's Eye View; Teaching Introductory Geoscience Courses Geologic Maps and Geologic Structures: A Texas Example                                                              |
| Utah       | Utah GeoSights                               | 70+ GeoSights showcase UT geology by region           | ESS1C, ESS2A, ESS3A | MnSTEP Discovering the Effect Mining has on Land; Teaching Sedimentary Geology Beforms to Facies to Prediction; Teaching Structural Geology Using Google Earth to Analyze Structures in SW Utah; InTeGrate Changing Biosphere |
| Washington | Washington 100                               | 100 WA geosites organized by 7 provinces              | ESS2B, ESS2C, ESS2E | InTeGrate Volcano Lab – Google Earth; MnSTEP Investigating how Terrain and Watershed are Connected; InTeGrate Changing Biosphere                                                                                              |
| Wyoming    | Rising from the Plains: A Geologic Companion | Geologic sites and geologists of WY                   | ESS1C, ESS2B, ESS2E | SERC Site Guide Geologic Time; EarthScope ANGLE Fault Models for Teaching About Plate Tectonics; InTeGrate Changing Biosphere                                                                                                 |

<sup>1</sup> Next Generation Science Standards (NGSS, NGSS Lead States 2013)

website: <https://www.nextgenscience.org/>

The Earth and Space Science standards (ESS) correspond to

ESS1B Earth and the Solar System

ESS1C History of Planet Earth

ESS2A Earth Materials and Systems

ESS2B Plate Tectonics and Large-Scale Systems

ESS2C Role of Water

ESS2E Biogeology

ESS3 Earth and Human Activity

ESS3A Natural Resources

ESS3B Natural Hazards

ESS3C Human impacts on Earth Systems

<sup>2</sup> Teach the Earth portal houses free resources on Science Education Resource Center at Carlton College:

<https://serc.carleton.edu/teachearth/index.html>

EarthLabs A Bird's Eye View: Exploring Your Region <https://serc.carleton.edu/earthlabs/climate/3.html>

EarthScope ANGLE Build a Better Wall [https://serc.carleton.edu/ANGLE/educational\\_materials/activities/205638.html](https://serc.carleton.edu/ANGLE/educational_materials/activities/205638.html)

EarthScope ANGLE Fault Models for Teaching About Plate Tectonics

[https://serc.carleton.edu/ANGLE/educational\\_materials/activities/205287.html](https://serc.carleton.edu/ANGLE/educational_materials/activities/205287.html)

EarthScope ANGLE Geologic Hazards and the Built Environment

[https://serc.carleton.edu/ANGLE/educational\\_materials/activities/245161.html](https://serc.carleton.edu/ANGLE/educational_materials/activities/245161.html)

EarthScope ANGLE Measure a Changing Volcano

[https://serc.carleton.edu/ANGLE/educational\\_materials/resources/205776.html](https://serc.carleton.edu/ANGLE/educational_materials/resources/205776.html)

Early Career Geoscience Faculty Illinois through Time

<https://serc.carleton.edu/NAGTWorkshops/earlycareer2010/activities/45775.html>

Geodesy Exploring plate motion and deformation in California with GPS

<https://serc.carleton.edu/NAGTWorkshops/geodesy/activities/247762.html>

InTeGrate Changing Biosphere: [https://serc.carleton.edu/integrate/teaching\\_materials/biosphere/index.html](https://serc.carleton.edu/integrate/teaching_materials/biosphere/index.html)

InTeGrate Volcano Lab – Google Earth

[https://serc.carleton.edu/integrate/workshops/online\\_learning/activities/178769.html](https://serc.carleton.edu/integrate/workshops/online_learning/activities/178769.html)

Mars for Earthlings: Integrating Introductory Geology with Mars Planetary Data

<https://serc.carleton.edu/marsforearthlings/index.html>

MnSTEP Discovering the Effect Mining has on Land <https://serc.carleton.edu/sp/mnstep/activities/36024.html>

MnSTEP Investigating Erosion <https://serc.carleton.edu/sp/mnstep/activities/36024.html>

MnSTEP Investigating how terrain and watershed are connected

<https://serc.carleton.edu/sp/mnstep/activities/26545.html>

Mn STEP Investigating the Earth Changes – Looking at Weathering and Erosion:

<https://serc.carleton.edu/sp/mnstep/activities/26353.html>

MnSTEP Mapping Your World <https://serc.carleton.edu/sp/mnstep/activities/19863.html>

MnSTEP Stream Study [https://serc.carleton.edu/ANGLE/educational\\_materials/activities/205638.html](https://serc.carleton.edu/ANGLE/educational_materials/activities/205638.html)

MnSTEP Water Quality

<https://serc.carleton.edu/sp/mnstep/activities/36024.html>

SERC Site Guide: Geologic Time: [https://serc.carleton.edu/serc/site\\_guides/geologic\\_time.html](https://serc.carleton.edu/serc/site_guides/geologic_time.html)

Teaching Introductory Geoscience Courses Geologic Maps and Geologic Structures: A Texas Example

<https://serc.carleton.edu/NAGTWorkshops/intro/activities/23569.html>

Teaching Introductory Geoscience Courses Geology of Mammoth Cave National Park

<https://serc.carleton.edu/NAGTWorkshops/intro/activities/186125.html>

Teaching Introductory Geoscience Courses Geology of Washington

<https://serc.carleton.edu/NAGTWorkshops/intro/virtual2014/courses/79855.html>

Teaching Sedimentary Geology Bedforms to Facies to Prediction: Walther's Law and Sequence Stratigraphic Analysis, Blackhawk Formation, UT <https://serc.carleton.edu/NAGTWorkshops/sedimentary/activities/14228.html>

Teaching Structural Geology Using Google Earth to Analyze Structures in Southwest Utah

<https://serc.carleton.edu/NAGTWorkshops/structure/SGT2012/activities/65763.html>

Using GIS and Remote Sensing to Teach Geoscience Land Use Change in MidCoast Maine

<https://serc.carleton.edu/NAGTWorkshops/gis/activities2/48014.html>
